# Supplementary material for: High-entropy alloys for water oxidation: a new class of electrocatalysts to look out for
Source: Royal Society of Chemistry journal article supplement (doi:10.1039/d0cc06485h), 2020-12-10
Supplement: d0cc06485h1.pdf [file d0cc06485h1.pdf]

## **High entropy alloy for water oxidation: A new class of electrocatalysts to lookout**

Ravi Nandan,<sup>1</sup> Mahendrakar. Y. Rekha,<sup>2</sup> Hemam Rachna Devi,<sup>1</sup> Chandan Srivastava<sup>2</sup> and  
Karuna Kar Nanda<sup>1,\*A</sup>

<sup>1</sup>Dr. Ravi Nandan, Hemam Rachna Devi, Prof. Karuna Kar Nanda

Materials Research Centre

Indian Institute of Science

Bangalore, PIN-560012, India.

Fax: +91-80-2360 7316; **Ph:** +91-80-2293 2996

<sup>2</sup> M. Y. Rekha, Prof. Chandan Srivastava

Materials Engineering,

Indian Institute of Science

Bangalore, PIN-560012, India.

Correspondence:- [nanda@iisc.ac.in](mailto:nanda@iisc.ac.in) (Prof. K. K. Nanda)

## Electrochemical characterization

Water oxidation/oxygen evolution reaction (OER) studies were performed using a traditional three-electrode cell system (CHI752, USA), wherein the working electrode was the modified commercial glassy carbon electrode (GCE, active geometrical area  $\sim 0.07 \text{ cm}^2$  which was the rotating disk electrode (RDE), CHI instruments) covered by active materials (S95:5/S80:20/S50:50) with Nafion<sup>®</sup> as a binder (5%, Sigma Aldrich) solution. Platinum (Pt) ring was used as counter electrode and KCl saturated Ag/AgCl as a reference electrode. A stock ink solution of each sample was prepared by taking 7 mg of the materials dispersed by sonication ( $\sim 1 \text{ h}$ ) in 1ml mixture of milli-Q water and ethanol (50:50%) solution. 100  $\mu\text{L}$  of this ink solution was then transferred to other plastic vial with 20  $\mu\text{L}$  of commercially available Nafion<sup>®</sup> binder solution followed by a sonication of 15 minutes. This catalyst ink solutions was drop-casted on the active area of glassy carbon electrode with the help of micropipette (to achieve the desired catalyst loading) followed by a drying under IR lamp. For comparative study all the potentials used in the present study are converted with respect to reversible hydrogen electrode (RHE) using the equation  $E_{\text{RHE}} = E_{\text{O Ag/AgCl}} + (0.059 \times \text{pH}) + E_{\text{Ag/AgCl}}$ , where  $E_{\text{O Ag/AgCl}}$  is 0.197 V vs. SHE.<sup>1</sup>

The water oxidation/OER study was performed in an alkaline (1 M NaOH) aqueous solution purged for 15 minutes with nitrogen gas prior to experiment. Potential scan speed used was 10 mV/s and working electrode rotation speed of 1200 rpm in the potential range of 0 to 0.8 V vs Ag/AgCl. For The Tafel slope calculations, a current window of 5-15  $\text{mA}/\text{cm}^2$  was used across the electrocatalysts for uniformity. To estimate the double layer capacitance ( $C_{\text{dl}}$ ), cyclic voltammetry study was performed in non-faradic region at different potential scan speed. As the all recorded OER current were

normalized with active geometrical surface area of working electrodes the loading of RuO<sub>2</sub> catalyst used for comparative studies was kept the same as that for S95:5, S80:20 and S50:50.

For the poisoning test, first we started the OER study in 1 M NaOH aqueous solution with a fresh working electrode. After the 25 cycles we paused the system and without disturbing the arrangement gently introduced NaCN in the aqueous solution of NaOH. The amount of NaCN was taken in such a way that the overall solution becomes 10 mM. After resuming the experiment, we observed a noticeable reduction in OER current density after 25 cycles (Figure 5c Main text). For cleaning the electrode after next 25 cycles of OER in NaCN, the poisoned solution was replaced by fresh milli-Q water without removing or disturbing the working electrode and the working electrode was rotated at 1200 rpm for 10 minutes. This process was repeated for 3 times, each time fresh milli-Q water was used for cleaning. After this the electrode was exposed to fresh 1 M NaOH aqueous solution for further OER study.

The OER performance on S95:5, S80:20 and S50:50 has been also studied in neutral, 0.1 M and 30 wt.% KOH aqueous solution (Figure S5-8). A 3.5 wt.% NaCl aqueous solution was used as a neutral medium in the present study (Figure S6).

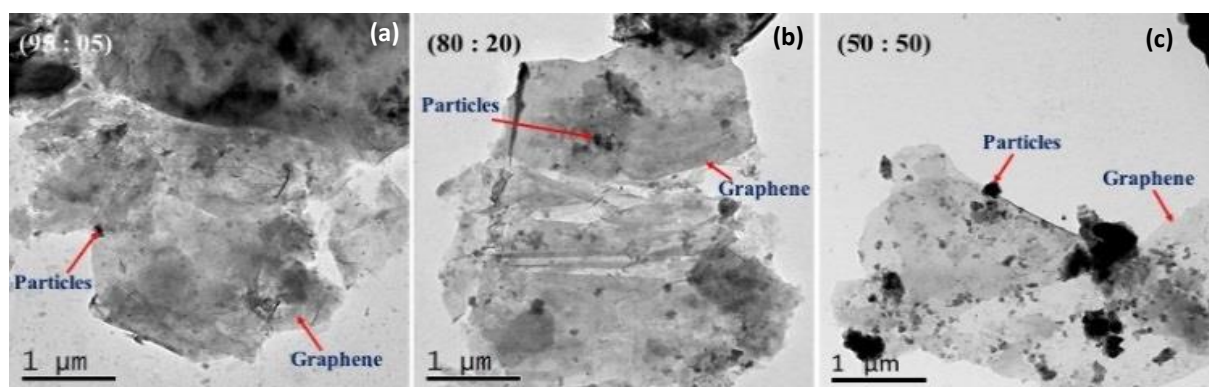

**Figure S1.** The representative low magnification bright-field TEM images of (a) S95:05, (b) S80:20 and (c) S50:50.

**Table S1.** Compositional analysis of FeCoNiCuCr HEA nanoparticles in different composites.

| Composites | Cu (at. %) | Co (at. %) | Cr (at. %) | Fe (at. %) | Ni (at. %) |
|------------|------------|------------|------------|------------|------------|
| S95:05     | 18.8       | 18.2       | 9.1        | 30.2       | 23.6       |
| S80:20     | 21.1       | 14.9       | 10.7       | 32.9       | 20.1       |
| S50:50     | 30.8       | 28.4       | 12.8       | 18.7       | 9.1        |

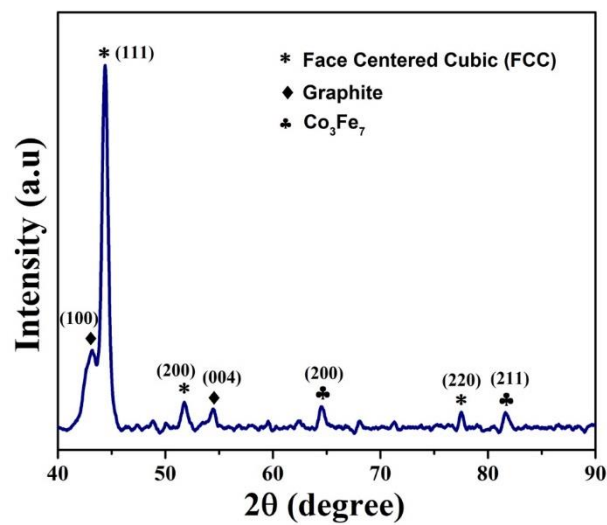

**Figure S2.** XRD pattern for S50:50. It clearly indicates the dominance of face centred cubic phase of FeCoNiCuCr nanoparticles.

The average crystallite size obtained from the Scherrer formula<sup>2</sup> and the full width half maximum (FWHM) of the fcc (111) peak was found to be 14 nm. This average crystallite size was in accordance with the average particle size as indicated in the size distribution histogram obtained for the S50:50 graphene-nanoparticle composite (Figure1f) from TEM study.



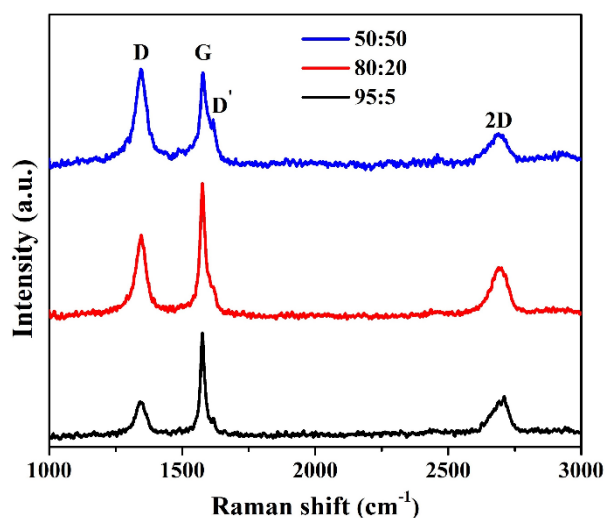

**Figure S3.** Raman spectra of graphene-HEA nanocomposites.

The Raman spectra were acquired using HORIBA JOBIN-YVON, LabRaman HR system consisting of a solid-state laser operating at 532 nm. Figure S3 shows the Raman spectra of all the three graphene-HEA nanocomposites. The D and D' bands represent defects in  $sp^3$  carbon atoms. The G and 2D bands represent in-plane vibrations of  $sp^2$  hybridized carbon atoms and two phonon lattice vibrations respectively.<sup>3</sup> The defect density ( $I_D/I_G$  ratio) of 95:5, 80:20 and 50:50 graphene-HEA nanoparticles were found to be 0.71, 0.81 and 1.01 respectively. The increase in defect density is due to the increased amount of metal nanoparticle content within the graphene sheets.

**Table S2.** Summary of Raman studies on graphene-HEA nanocomposites. (X represents the respective peak position ( $cm^{-1}$ ) and Y is the concomitant intensity of peak.)

| Samples | $I_D$                    | $I_G$                    | $I_{2D}$                  | $I_D/I_G$ |
|---------|--------------------------|--------------------------|---------------------------|-----------|
| 95:5    | X = 1342.3<br>Y = 136.73 | X = 1576.1<br>Y = 192.24 | X = 2710.9<br>Y = 140.81  | 0.7112    |
| 80:20   | X = 1345.5<br>Y = 175.69 | X = 1576.1<br>Y = 217.47 | X = 2689.0<br>Y = 149.43  | 0.8078    |
| 50:50   | X = 1345.1<br>Y = 202.85 | X = 1577.7<br>Y = 199.91 | X = 2687.4<br>Y = 150.309 | 1.0147    |

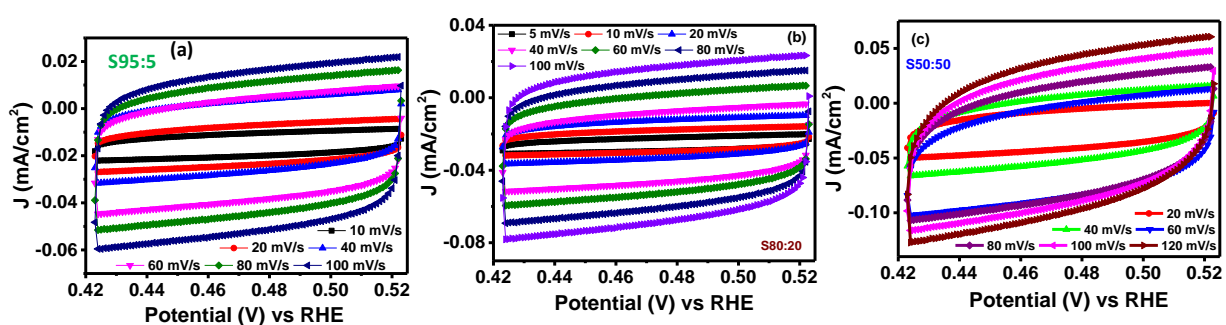

**Figure S4.** CV curves recorded in non-Faradic region on (a) S95:5, (b) S80:20 and (c) S50:50 in 1 M NaOH aqueous solution for double layer capacitance evaluation.

**Table S3.** Summary of water oxidation performance of various electrocatalysts in alkaline medium.

| Composites       | $E_{\text{onset}}$ (V) | $E_{J=10}$ (V) | Tafel slope (mV/dec) | $J_{\text{specific activity}}$ (mA/cm <sup>2</sup> ) @ 1.75 V | $J_{\text{Mass activity}}$ (mA/mg) @ 1.75 V |
|------------------|------------------------|----------------|----------------------|---------------------------------------------------------------|---------------------------------------------|
| S95:05           | 1.55                   | 1.6            | 94                   | 66                                                            | 190                                         |
| S80:20           | 1.53                   | 1.58           | 91                   | 87                                                            | 247                                         |
| S50:50           | 1.515                  | 1.56           | 80                   | 149                                                           | 380                                         |
| RuO <sub>2</sub> | 1.51                   | 1.575          | 114                  | 68                                                            | 193                                         |

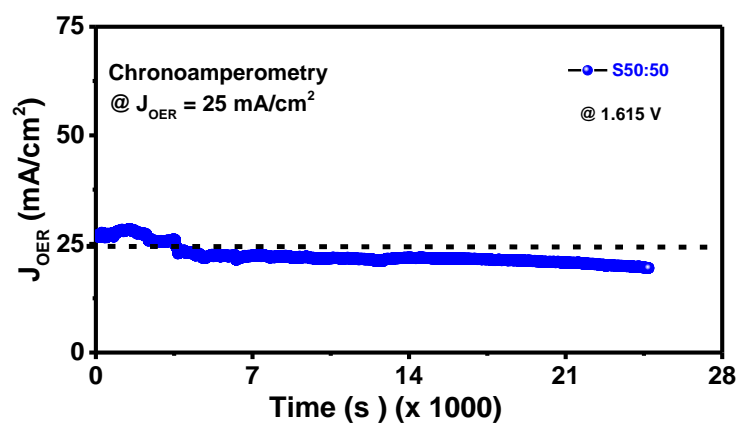

**Figure S5.** Chronoamperometric study on S50:50 at a current density of  $\sim 25 \text{ mA/cm}^2$  in nitrogen saturated alkaline (1 M NaOH) aqueous solution. The working electrode rotational speed was 1200 rpm during the measurement.

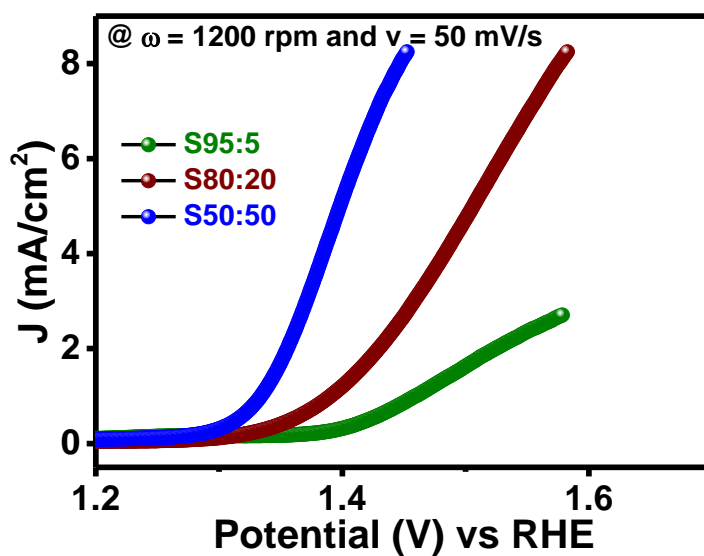

**Figure S6.** OER polarization curves for S95:5, S80:20 and S50:50 in neutral aqueous solution.

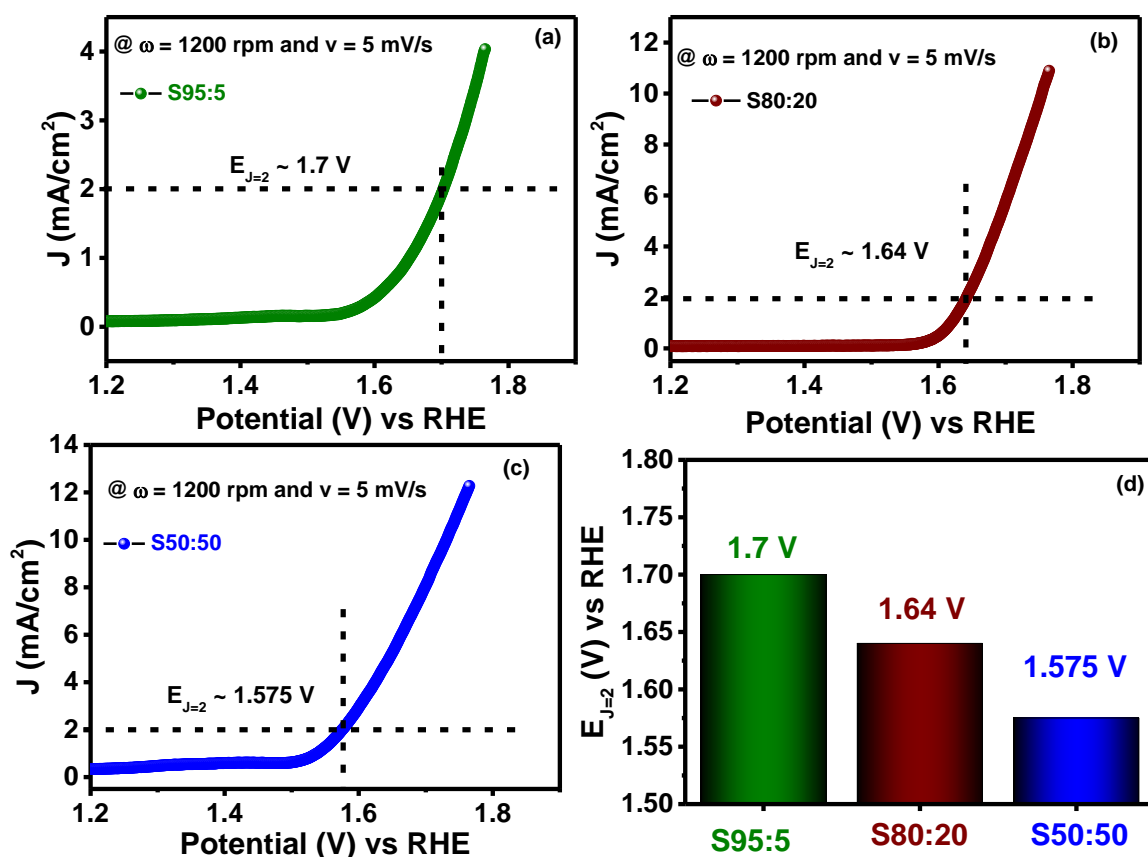

**Figure S7.** OER polarization curves for (a) S95:5, (b) S80:20 and (c) S50:50, in 0.1 M KOH aqueous solution. (d) The potential required for different electrocatalysts to achieve a current density of 2 mA/cm² as deduced from Figure S7a-c. The experimental findings suggest that S50:50 have comparatively better electrochemical water oxidation capability under identical experimental conditions.

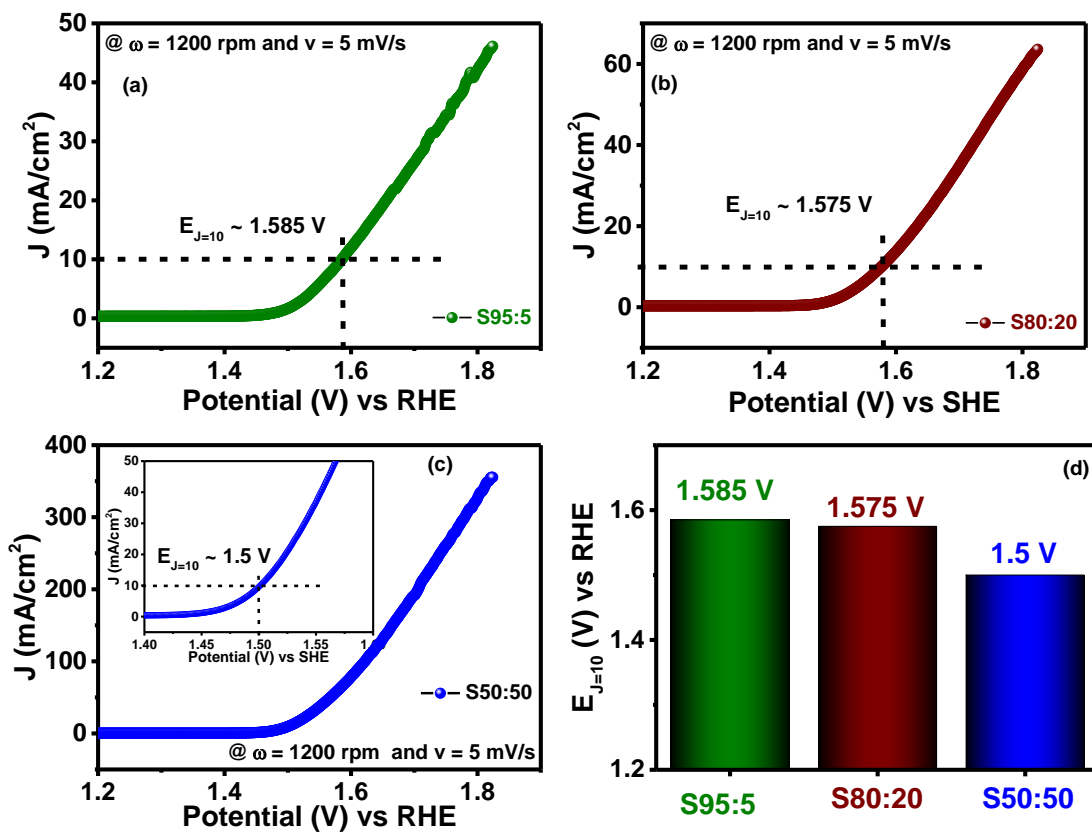

**Figure S8.** OER polarization curves for (a) S95:5, (b) S80:20 and (c) S50:50, in 30 wt.% KOH aqueous solution. (d) The potential required for different electrocatalysts to achieve a current density of 10 mA/cm<sup>2</sup> as deduced from Figure S8a-c. The experimental findings suggest that S50:50 have comparatively much better electrochemical water oxidation capability under identical experimental conditions.

**Table S4.** OER activity comparison of graphene-FeCoNiCuCr HEA nanocomposite with various recently reported state-of-the-art metal chalcogenides electrocatalysts in alkaline medium (1 M NaOH/KOH).

| Electrocatalysts                                      | Over potential at $J_{\text{OER}} = 10$ mA/cm <sup>2</sup> (mV) | Journals                                       |
|-------------------------------------------------------|-----------------------------------------------------------------|------------------------------------------------|
| CoS <sub>2</sub> nanoparticles                        | 430                                                             | Adv. Funct. Mater., 2017, 27, 1701008.         |
| Co <sub>9</sub> S <sub>8</sub> @MoS <sub>2</sub> /CNF | 430                                                             | Adv. Mater., 2015, 27, 4752–4759.              |
| CoS                                                   | 361                                                             | Electrochem. Commun., 2015, 60, 92–96          |
| MoS <sub>2</sub> /Ni <sub>3</sub> S <sub>2</sub>      | 420                                                             | Angew. Chem., Int. Ed. <b>2016</b> , 55, 6702  |
| NiSe nanowires                                        | 400                                                             | Angew. Chem., Int. Ed. <b>2015</b> , 54, 9351. |
| Mn <sub>3</sub> O <sub>3</sub> /CoSe <sub>2</sub>     | 450                                                             | J. Am. Chem. Soc. 2012, 134 (6), 2930-2933.    |
| Ni <sub>3</sub> 3S <sub>2</sub> @NC                   | 390                                                             | Dalton Trans., 2016, 45, 6352–6356             |
| Co <sub>9</sub> S <sub>8</sub> /N,S–C                 | 350                                                             | Nanoscale, 2017, 9, 12432–12440                |
| Co <sub>9</sub> S <sub>8</sub> @NOSC                  | 340                                                             | Adv. Funct. Mater., 2017, 27, 1606585          |
| <b>Graphene-FeCoNiCuCr HEA nanocomposite</b>          | <b>330</b>                                                      | <b>Present study</b>                           |

**Table S5.** OER activity comparison on graphene-FeCoNiCuCr HEA nanocomposite with various recently reported state-of-the-art metal phosphides electrocatalysts in alkaline medium (1 M NaOH/KOH).

| Electrocatalysts                             | Over potential at $J_{\text{OER}} = 10 \text{ mA/cm}^2$ (mV) | Journals                                        |
|----------------------------------------------|--------------------------------------------------------------|-------------------------------------------------|
| CoP/rGO-400                                  | 340 mV                                                       | Chem. Rev., 2013, 113, 5782–5816.               |
| NiCoP/C nanoboxes                            | 330 mV                                                       | Angew. Chem., Int. Ed., 2017, 56, 3897–3900     |
| Co <sub>2</sub> P                            | 370                                                          | J. Am. Chem. Soc., 2016, 138, 4006–4009.        |
| CoMnP                                        | 330                                                          |                                                 |
| CoP/rGO-400                                  | 340                                                          | Chem. Sci., 2016, 7, 1690–1695.                 |
| Co-P/ NC                                     | 354                                                          | Chem. Mater. 2015, 27 (22), 7636-7642.          |
| Co-P films                                   | 345                                                          | Angew. Chem. Int. Ed. 2015, 54 (21), 6251-6254. |
| <b>Graphene-FeCoNiCuCr HEA nanocomposite</b> | <b>330</b>                                                   | <b>Present study</b>                            |

**Table S6.** OER activity comparison on graphene-FeCoNiCuCr HEA nanocomposite with various recently reported state-of-the-art metal nitrides and borides electrocatalysts in alkaline medium (1 M NaOH/KOH).

| Electrocatalysts                             | Over potential at $J_{\text{OER}} = 10 \text{ mA/cm}^2$ (mV) | Journals                                     |
|----------------------------------------------|--------------------------------------------------------------|----------------------------------------------|
| Ni <sub>3</sub> N nanosheets                 | 350                                                          | J. Am. Chem. Soc., 2015, 137, 4119–4125      |
| Co <sub>2</sub> N                            | 430                                                          | Inorg. Chem. Front., 2016, 3, 236–242.       |
| Co <sub>3</sub> N                            | 410                                                          |                                              |
| Co <sub>4</sub> N                            | 330                                                          |                                              |
| Ni <sub>3</sub> N                            | 430                                                          | ChemSusChem, 2010, 3, 169–180.               |
| Amorphous cobalt boride (Co <sub>2</sub> B)  | 367                                                          | Angew. Chem., Int. Ed., 2017, 56, 3897–3900. |
| Amorphous cobalt phyllosilicate              | 380                                                          | Adv. Energy Mater., 2016, 6, 1601189.        |
| <b>Graphene-FeCoNiCuCr HEA nanocomposite</b> | <b>330</b>                                                   | <b>Present study</b>                         |



**Table S7.** OER activity comparison on graphene-FeCoNiCuCr HEA nanocomposite with various recently reported state-of-the-art oxide based electrocatalysts in alkaline medium (1 M NaOH/KOH).

| Electrocatalysts                                                 | Over potential at $J_{\text{OER}} = 10 \text{ mA/cm}^2$ (mV) | Journals                                                    |
|------------------------------------------------------------------|--------------------------------------------------------------|-------------------------------------------------------------|
| CoCr <sub>2</sub> O <sub>4</sub>                                 | 422                                                          | Small, 2016, 12, 2866–2871.                                 |
| CoCr <sub>2</sub> O <sub>4</sub> /CNT                            | 326                                                          |                                                             |
| Co <sub>3</sub> O <sub>4</sub>                                   | 400                                                          | RSC Adv., 2016, 6, 2019–2023                                |
| Co <sub>3</sub> V <sub>2</sub> O <sub>8</sub>                    | 359                                                          | J. Mater. Chem. A, 2014, 2, 18435–18443                     |
| Co <sub>3</sub> O <sub>4</sub>                                   | 384                                                          |                                                             |
| V <sub>2</sub> O <sub>5</sub>                                    | 451                                                          |                                                             |
| CuFe <sub>2</sub> O <sub>4</sub>                                 | 367                                                          | Journal of colloidal and interface science 2019, 540, 59-65 |
| CoFe <sub>2</sub> O <sub>4</sub>                                 | 414                                                          |                                                             |
| NiFe <sub>2</sub> O <sub>4</sub>                                 | 433                                                          |                                                             |
| NiCo <sub>2</sub> O <sub>4</sub> nanowall arrays                 | 340                                                          | <i>Adv. Energy Mater.</i> <b>2017</b> , 7, 1602391.         |
| CoO <sub>x</sub> @CN                                             | 385                                                          | J. Am. Chem. Soc. 2015, 137 (7), 2688-2694.                 |
| Co <sub>3</sub> O <sub>4</sub> /NiCo <sub>2</sub> O <sub>4</sub> | 340                                                          | J. Am. Chem. Soc. 2015, 137 (16), 5590-5595.                |
| N-G-CoO                                                          | 340                                                          | Energy Environ. Sci. 2014, 7 (2), 609-616.                  |
| Ni <sub>x</sub> Co <sub>3-x</sub> O <sub>4</sub>                 | 370                                                          | Adv. Mater. 2010, 22 (17), 1926-1929                        |
| MnCo <sub>2</sub> O <sub>x</sub>                                 | 410                                                          | J. Am. Chem. Soc. 2014, 136 (47), 16481-16484.              |
| MnO <sub>x</sub> film                                            | 563                                                          | J. Am. Chem. Soc. 2012, 134 (41), 17253-17261.              |
| <b>Graphene-FeCoNiCuCr HEA nanocomposite</b>                     | <b>330</b>                                                   | <b>Present study</b>                                        |

**Table S8.** OER activity comparison on graphene-FeCoNiCuCr HEA nanocomposite with various recently reported state-of-the-art double layered hydroxides (LDH) based electrocatalysts in alkaline medium (1 M NaOH/KOH).

| Electrocatalysts                             | Over potential at $J_{\text{OER}} = 10$ mA/cm <sup>2</sup> (mV) | Journals                                          |
|----------------------------------------------|-----------------------------------------------------------------|---------------------------------------------------|
| NiCo-LDH                                     | 335                                                             | Nat. Commun., 2014, 5, 4477.                      |
| CoCo-LDH                                     | 350                                                             | Nat. Commun., 2014, 5, 4477.                      |
| NiCo LDH MS                                  | 409                                                             | Carbon, 2016, 110, 1–7.                           |
| Exfoliated NiCo LDH                          | 367                                                             | Nano Lett., 2015, 15, 1421–1427                   |
| Exfoliated NiCo NS                           | 334                                                             | Nat. Commun., 2014, 5, 4477.                      |
| CoNiMn LDH/polypyrrole/RGO                   | 369                                                             | Nano Res., 2016, 9, 713–725                       |
| Ni <sub>0.75</sub> Fe <sub>0.25</sub> LDH    | 350                                                             | Nat. Commun., 2016, 7, 11981                      |
| Ni <sub>5</sub> Mn LDH/MWCNT                 | 350                                                             | ACS Appl. Mater. Interfaces, 2016, 8, 14527–14534 |
| Exfoliated CoCo NS                           | 353                                                             | Nat. Commun., 2014, 5, 4477                       |
| NiCo LDH nanoplates                          | 367                                                             | <i>Nano Lett.</i> <b>2015</b> , 15, 1421          |
| d-FeOOH nanosheets                           | 390                                                             | <i>Adv. Mater.</i> <b>2018</b> , 30, 1803144      |
| CoCo LDH                                     | 393                                                             | Nat. Commun. 2014, 5, 4477                        |
| <b>Graphene-FeCoNiCuCr HEA nanocomposite</b> | <b>330</b>                                                      | <b>Present study</b>                              |

**Table S9.** OER activity comparison on graphene-FeCoNiCuCr HEA nanocomposite with various recently reported state-of-the-art some transition (mono-/multi-) metal based electrocatalysts in alkaline medium (1 M NaOH/KOH).

| Electrocatalysts                                       | Over potential at $J_{\text{OER}} = 10 \text{ mA/cm}^2$ (mV) | Journals                                                   |
|--------------------------------------------------------|--------------------------------------------------------------|------------------------------------------------------------|
| CoCx@NC                                                | 450                                                          | Journal of Catalysis 2019, 371, 185-195                    |
| FeCo@NC                                                | 480                                                          |                                                            |
| N-doped CoCx/FeCo@C/rGO                                | 390                                                          |                                                            |
| CoCr(9:1)@NGT                                          | 330                                                          | ACS Appl. Energy Mater., <b>2018</b> , 1 (3), pp 1116–1126 |
| CoCr(7:3)@NGT                                          | 362                                                          |                                                            |
| Co@NGT                                                 | 520                                                          |                                                            |
| Fe <sub>3</sub> C-FeNx enriched carbon sphere          | 343                                                          | J. Mater. Chem. A, 2018, 6, 8537                           |
| Fe <sub>3</sub> C-NCNTs co-embedded boron doped carbon | 355                                                          | J. Mater. Chem. A, 2017, 5, 16843-16853                    |
| <b>Graphene-FeCoNiCuCr HEA nanocomposite</b>           | <b>330</b>                                                   | <b>Present study</b>                                       |

## References

- 1 R. Nandan, A. Gautam and K. K. Nanda, *J. Mater. Chem. A*, 2018, **6**, 20411–20420.
- 2 H. R. Devi, R. Nandan and K. K. Nanda, *ACS Appl. Mater. Interfaces*, 2020, **12**, 13888–13895.
- 3 M. Alanyalioglu, J. J. Segura, J. Oró-Sol and N. Casañ-Pastor, in *Carbon*, Elsevier Ltd, 2012, vol. 50, pp. 142–152; M. Y. Rekha, N. Mallik and C. Srivastava, *Sci. Rep.*, 2018, **8**, 1.
